# Supplementary material for: AplusB: A Web Application for Investigating A + B Designs for Phase I Cancer Clinical Trials
Source: PubMed Central journal article supplement (PMC4942070; doi:10.1371/journal.pone.0159026), 2016-07-12
Supplement: pone.0159026.s003.pdf [file pone.0159026.s003.pdf]

| $A = B$ | Number of dose levels |       |       |       |       |       |       |       |        |
|---------|-----------------------|-------|-------|-------|-------|-------|-------|-------|--------|
|         | 2                     | 3     | 4     | 5     | 6     | 7     | 8     | 9     | 10     |
| 1       | 0.139                 | 0.269 | 0.525 | 0.992 | 1.459 | 2.212 | 3.160 | 4.553 | 6.324  |
| 2       | 0.139                 | 0.284 | 0.565 | 0.969 | 1.518 | 2.311 | 3.375 | 4.912 | 7.264  |
| 3       | 0.117                 | 0.294 | 0.559 | 0.964 | 1.544 | 2.322 | 3.554 | 5.414 | 8.719  |
| 4       | 0.126                 | 0.290 | 0.568 | 0.980 | 1.554 | 2.428 | 3.716 | 5.903 | 9.930  |
| 5       | 0.121                 | 0.291 | 0.567 | 0.987 | 1.605 | 2.514 | 3.931 | 6.421 | 10.636 |
| 6       | 0.124                 | 0.301 | 0.588 | 0.993 | 1.623 | 2.559 | 4.124 | 6.890 | 11.352 |

Table S1: Mean computation times in seconds for  $A + B$  designs. Assumed  $A = B$ ,  $\{C, D, E\} = \{1, 1, 1\}$  and de-escalation is not permitted.  $n = 100$ .
