# Supplementary material for: AplusB: A Web Application for Investigating A + B Designs for Phase I Cancer Clinical Trials
Source: PubMed Central journal article supplement (PMC4942070; doi:10.1371/journal.pone.0159026), 2016-07-12
Supplement: pone.0159026.s004.pdf [file pone.0159026.s004.pdf]

| $A = B$ | Number of dose levels |       |       |       |       |       |       |       |       |
|---------|-----------------------|-------|-------|-------|-------|-------|-------|-------|-------|
|         | 2                     | 3     | 4     | 5     | 6     | 7     | 8     | 9     | 10    |
| 1       | 0.054                 | 0.044 | 0.081 | 0.156 | 0.243 | 0.340 | 0.452 | 0.836 | 1.564 |
| 2       | 0.054                 | 0.046 | 0.087 | 0.139 | 0.255 | 0.344 | 0.512 | 0.981 | 1.861 |
| 3       | 0.021                 | 0.057 | 0.086 | 0.142 | 0.251 | 0.351 | 0.587 | 1.268 | 2.286 |
| 4       | 0.035                 | 0.055 | 0.088 | 0.160 | 0.255 | 0.388 | 0.647 | 1.483 | 2.509 |
| 5       | 0.023                 | 0.049 | 0.085 | 0.167 | 0.263 | 0.402 | 0.720 | 1.684 | 2.735 |
| 6       | 0.025                 | 0.045 | 0.100 | 0.153 | 0.255 | 0.406 | 0.815 | 1.864 | 2.934 |

Table S2: Standard deviation of computation times in seconds for  $A + B$  designs. Assumed  $A = B$ ,  $\{C, D, E\} = \{1, 1, 1\}$  and de-escalation is not permitted.  $n = 100$ .
