# Supplementary material for: AplusB: A Web Application for Investigating A + B Designs for Phase I Cancer Clinical Trials
Source: PubMed Central journal article supplement (PMC4942070; doi:10.1371/journal.pone.0159026), 2016-07-12
Supplement: pone.0159026.s005.pdf [file pone.0159026.s005.pdf]

| $A = B$ | Number of dose levels |       |       |       |       |       |        |        |         |
|---------|-----------------------|-------|-------|-------|-------|-------|--------|--------|---------|
|         | 2                     | 3     | 4     | 5     | 6     | 7     | 8      | 9      | 10      |
| 1       | 0.371                 | 0.866 | 1.227 | 1.248 | 1.971 | 2.826 | 5.630  | 13.546 | 33.324  |
| 2       | 0.331                 | 0.931 | 1.617 | 1.935 | 3.141 | 4.721 | 11.936 | 28.015 | 80.167  |
| 3       | 0.263                 | 0.776 | 1.301 | 1.878 | 2.927 | 5.505 | 15.280 | 37.024 | 115.234 |
| 4       | 0.256                 | 0.731 | 1.143 | 1.922 | 2.981 | 6.715 | 17.260 | 43.238 | 149.624 |
| 5       | 0.365                 | 0.788 | 1.040 | 1.942 | 3.238 | 8.342 | 19.908 | 50.919 | 180.067 |
| 6       | 0.469                 | 0.871 | 1.046 | 2.014 | 3.368 | 8.761 | 22.127 | 58.944 | 214.449 |

Table S3: Mean computation times in seconds for  $A + B$  designs. Assumed  $A = B$ ,  $\{C, D, E\} = \{1, 1, 2\}$  and de-escalation is not permitted.  $n = 100$ .
