# Supplementary material for: AplusB: A Web Application for Investigating A + B Designs for Phase I Cancer Clinical Trials
Source: PubMed Central journal article supplement (PMC4942070; doi:10.1371/journal.pone.0159026), 2016-07-12
Supplement: pone.0159026.s006.pdf [file pone.0159026.s006.pdf]

| $A = B$ | Number of dose levels |       |       |       |       |       |        |        |         |
|---------|-----------------------|-------|-------|-------|-------|-------|--------|--------|---------|
|         | 2                     | 3     | 4     | 5     | 6     | 7     | 8      | 9      | 10      |
| 1       | 0.992                 | 1.555 | 2.529 | 1.250 | 2.006 | 2.351 | 4.196  | 12.662 | 16.828  |
| 2       | 0.728                 | 1.652 | 3.181 | 2.637 | 3.175 | 3.748 | 13.136 | 21.569 | 58.720  |
| 3       | 0.357                 | 1.521 | 2.291 | 1.927 | 2.606 | 4.114 | 16.283 | 28.110 | 85.627  |
| 4       | 0.326                 | 1.283 | 1.226 | 2.102 | 3.230 | 4.440 | 16.302 | 24.079 | 117.398 |
| 5       | 0.817                 | 1.484 | 0.915 | 2.100 | 3.746 | 8.969 | 18.729 | 30.526 | 130.481 |
| 6       | 1.008                 | 1.568 | 0.913 | 2.050 | 2.589 | 6.771 | 18.137 | 28.143 | 141.181 |

Table S4: Standard deviation of computation times in seconds for  $A + B$  designs. Assumed  $A = B$ ,  $\{C, D, E\} = \{1, 1, 2\}$  and de-escalation is not permitted.  $n = 100$ .
